RESEARCH ARTICLE

# Cleavage of Model Substrates by *Arabidopsis thaliana* PRORP1 Reveals New Insights into Its Substrate Requirements

Guanzhong Mao<sup>1</sup>✉, Tien-Hao Chen<sup>2</sup>✉, Abhishek S. Srivastava<sup>1</sup>✉, David Kosek<sup>1</sup>, Pradip K. Biswas<sup>2</sup>, Venkat Gopalan<sup>2</sup>, Leif A. Kirsebom<sup>1</sup>\*

**1** Department of Cell and Molecular Biology, Box 596, Biomedical Centre, SE-751 24, Uppsala, Sweden,

**2** Department of Chemistry & Biochemistry, Center for RNA Biology, The Ohio State University, Columbus, Ohio, 43210, United States of America

✉ These authors contributed equally to this work.

✉ Current address: Discovery Sciences, AstraZeneca R&D, Cambridge Science Park, Cambridge, CB4 0WG, United Kingdom

\* [Leif.Kirsebom@icm.uu.se](mailto:Leif.Kirsebom@icm.uu.se)

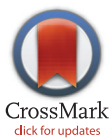

**OPEN ACCESS**

**Citation:** Mao G, Chen T-H, Srivastava AS, Kosek D, Biswas PK, Gopalan V, et al. (2016) Cleavage of Model Substrates by *Arabidopsis thaliana* PRORP1 Reveals New Insights into Its Substrate Requirements. PLoS ONE 11(8): e0160246. doi:10.1371/journal.pone.0160246

**Editor:** Akio Kanai, Keio University, JAPAN

**Received:** May 27, 2016

**Accepted:** July 15, 2016

**Published:** August 5, 2016

**Copyright:** © 2016 Mao et al. This is an open access article distributed under the terms of the [Creative Commons Attribution License](https://creativecommons.org/licenses/by/4.0/), which permits unrestricted use, distribution, and reproduction in any medium, provided the original author and source are credited.

**Data Availability Statement:** All relevant data are within the paper and its Supporting Information files.

**Funding:** This work was funded by Swedish Research Council Linneaus Support to Uppsala RNA Research Center Dnr 349-2006-267, <http://www.vr.se/>; Swedish Research Council N/T Dnr 621-2011-5848, <http://www.vr.se/>; Carl Tryggers Foundation for Scientific Research CTS10:192, <http://www.carltryggersstiftelse.se/>; National Science Foundation [MCB-0843543 to V.G.]; OSU Center for RNA Biology Seed grant [to Biao Ding, and V.G.]; and the Behrman Research Fund.

## Abstract

Two broad classes of RNase P trim the 5' leader of precursor tRNAs (pre-tRNAs): ribonucleoprotein (RNP)- and proteinaceous (PRORP)-variants. These two RNase P types, which use different scaffolds for catalysis, reflect independent evolutionary paths. While the catalytic RNA-based RNP form is present in all three domains of life, the PRORP family is restricted to eukaryotes. To obtain insights on substrate recognition by PRORPs, we examined the 5' processing ability of recombinant *Arabidopsis thaliana* PRORP1 (*AtPRORP1*) using a panel of pre-tRNA<sup>Ser</sup> variants and model hairpin-loop derivatives (pATSer type) that consist of the acceptor-T-stem stack and the T-/D-loop. Our data indicate the importance of the identity of N<sub>-1</sub> (the residue immediately 5' to the cleavage site) and the N<sub>-1</sub>:N<sub>+73</sub> base pair for cleavage rate and site selection of pre-tRNA<sup>Ser</sup> and pATSer. The nucleobase preferences that we observed mirror the frequency of occurrence in the complete suite of organellar pre-tRNAs in eight algae/plants that we analyzed. The importance of the T-/D-loop in pre-tRNA<sup>Ser</sup> for tight binding to *AtPRORP1* is indicated by the 200-fold weaker binding of pATSer compared to pre-tRNA<sup>Ser</sup>, while the essentiality of the T-loop for cleavage is reflected by the near-complete loss of activity when a GAAA-tetraloop replaced the T-loop in pATSer. Substituting the 2'-OH at N<sub>-1</sub> with 2'-H also resulted in no detectable cleavage, hinting at the possible role of this 2'-OH in coordinating Mg<sup>2+</sup> ions critical for catalysis. Collectively, our results indicate similarities but also key differences in substrate recognition by the bacterial RNase P RNP and *AtPRORP1*: while both forms exploit the acceptor-T-stem stack and the elbow region in the pre-tRNA, the RNP form appears to require more recognition determinants for cleavage-site selection.

**Competing Interests:** The authors of this manuscript have the following competing interests: LAK Stock and shareholder Bioimics AB. This does not alter the authors' adherence to PLOS ONE policies on sharing data and materials.

## Introduction

Most tRNA genes are transcribed as precursor RNAs (pre-tRNAs) with both the 5' and 3' ends having additional residues that need to be removed to generate functional, mature tRNAs. The ubiquitous ribonucleoprotein (RNP) ribonuclease P (RNase P) is responsible for removing the 5' leader from pre-tRNAs. In Bacteria, RNase P is composed of one RNA subunit and one protein subunit, while in Archaea and Eukarya four or more proteins associate with the sole RNA [1, 2]. Irrespective of origin, the catalytic activity resides in the RNase P RNA (RPR) as evident from its ability, even in the absence of associated protein cofactor(s), to mediate cleavage of pre-tRNA as well as various other natural (e.g., pre-4.5S RNA) and artificial (e.g., model hairpin loop) substrates [1–7].

In several eukaryotes, there also exists an RNA-free RNase P that is composed solely of proteins [8]. PRORP (proteinaceous RNase P) cleaves pre-tRNAs at the same site as the RNP variants, and is also involved in tRNA 5'-maturation. In *Arabidopsis thaliana*, three distinct PRORPs (*AtPRORP1*, 2 and 3) are present, but an RPR has not been identified [9]. *AtPRORP1* is localized to the mitochondria and chloroplasts, while *AtPRORP2* and *AtPRORP3* are targeted to the nucleus [9]. Single-polypeptide PRORPs from *A. thaliana* nucleus/organelles have been characterized and shown to be active as individual entities, while the human mitochondrial native variant was purified as a complex with two other proteins [8, 9]. RNAi-mediated knock-down of *AtPRORP1* showed protein synthesis defects in chloroplasts and mitochondria, although only photosynthesis was defective and respiration was unaffected; interestingly, the effects on 5' processing of individual organellar tRNAs were not uniform [10]. To better understand these phenotypic effects and, more broadly, appreciate the choice of RNP- and protein-based RNase P for pre-tRNA/RNA processing, it is important to understand how the two variants recognize and process their substrates [10,11], the motivation for this study.

By examining cleavage of pre-tRNAs and model substrates, residues at and near the cleavage site have been demonstrated to influence both cleavage-site recognition and cleavage efficiency of bacterial ribonuclease P (for a review, see [12]). Specifically, the residue  $N_{-1}$ , the discriminator base and the two C residues at the pre-tRNA 3' end, and the T-loop have key roles [7, 13–15]; for reviews, see [1, 16]. In contrast, we have little information about either the impact of individual substrate residues and chemical groups on cleavage or if members of the PRORP family process small model substrates.

Given the ability to chemically synthesize short RNAs (~50 nts), especially with desired chemical modifications, we previously invested considerable effort into design and validation of short hairpin model substrates for the RNP version of RNase P. We have now used this approach to investigate for the first time the effect of certain site-specific replacements (e.g., guanosine with inosine or a 2'-OH with a 2'-H) on substrate recognition and cleavage by *AtPRORP1*. Our data show that recombinant *AtPRORP1* cleaves model hairpin loop substrates with at least a 1000-fold lower single-turnover rate than that observed for cleavage of the parental pre-tRNA (pSu1, the *Escherichia coli* tRNA<sup>Ser</sup>Su1 precursor). We also found a dramatic decrease in the cleavage rate upon replacement of either the 2'-hydroxyl at -1 or the seven-bp T-loop equivalent with a GAAA-tetraloop in the model substrate. Moreover, like the bacterial RPR, the -1 identity is an important cleavage-site determinant in the context of both pre-tRNA and model substrates, irrespective of whether the -1 residue is paired or not with the residue at the discriminator position. These results led to some predictions in terms of disfavored sequences for processing by *AtPRORP1*. We gained support for these predictions by examining the sequences of all mitochondrial and chloroplast tRNA genes from eight different green algae and plants, an analysis not reported before. Together, these findings provide new insights into *AtPRORP1*-mediated catalysis and offer possibilities to dissect the role of

individual residues and chemical groups important for cleavage. We have also integrated our findings with two very recent studies on PRORP-mediated substrate recognition [17, 18] that appeared during preparation of this manuscript.

## Materials and Methods

### Preparation of substrates

The *Escherichia coli* tRNA<sup>Ser</sup>Su1 precursor (*Eco* pSu1) and its variants were generated as run-off transcripts using T7 DNA-dependent RNA polymerase and PCR-amplified templates as described elsewhere [19, 20; Mao & Kirsebom, unpublished]. The different model hairpin loop substrates, pATSer, were purchased from Dharmacon, USA, purified on a 15% (w/v) polyacrylamide/7M urea gel culminating in an overnight Bio-Trap extraction (Schleicher and Schuell, BmbH, Germany; Elutrap in USA and Canada). The different substrates were 5'-end-labeled with  $\gamma$ -[<sup>32</sup>P]-ATP using 30 units of T4 polynucleotide kinase (ThermoFisher Scientific) and gel-purified using standard protocols [7, 21, 22]. *Eco* RNase P RNA (*Eco* RPR) was generated as described elsewhere [23, 24].

### Preparation of substrates for binding studies

The DNA template for *in vitro* transcription of pSu1 with a 5-nt trailer was generated by PCR using primers FWD (5'-taatacgcactcactatagatctgaatggagag-3'; the italicized g was added to facilitate transcription) and REV (5'-gggtgctcgagagagggggattt-3'; the trailer sequence added is italicized). The DNA template was the plasmid pUC19-pSu1 [20].

The DNA template for *in vitro* transcription of pATSerUG derivatives (Fig 1) were generated in two phases. In the first step, fill-in reactions were performed with two oligos: pATSerUG (5'-actcactatagatctgaatggagagagggg-3' and 5'-gggatttgaacccccctctctccattcagatc-3') and pATSerUG<sub>GAAA</sub> (5'-actcactatagatctgaatg gagagagggg-3' and 5'-gggtttccccctctctccattcagatc-3'); the overlapping regions in each pair are italicized. In the second step, the fill-in products were subjected to PCR amplification to obtain the complete sequence (including the T7 RNA polymerase promoter): for pATSerUG, the forward and reverse primers were 5'-taatacgcactcactatagatctgaatg-3' and 5'-gggtgctcgagagagggggatttgaacccc-3', respectively; for pATSerUG<sub>GAAA</sub>, only the reverse primer was changed (5'-gggtgctcgagagagggggatttcccc-3'). The amplicons were purified and used in *in vitro* transcription as described elsewhere [25].

3'-Labeling of pSu1 and the pATSer derivatives was performed with some modifications of a previously described procedure [26–28]. For each substrate, 130  $\mu$ M of *in vitro* transcribed RNA in 100  $\mu$ L 100 mM NaOAc (pH 4.5) was oxidized by addition of 10 mM NaIO<sub>4</sub>, and incubated at 22°C for 1.5 h in the dark. The RNAs were then ethanol precipitated and re-suspended in 500  $\mu$ L of 100 mM NaOAc (pH 5.2) using a 20:1 molar ratio of fluorescein-5-thiosemicarbazide (FTSC):RNA; FTSC was a generous gift of Prof. Edward Behrman, Ohio State University (OSU). The labeling reactions were carried out at 4°C for 16 h in the dark. Excess, unincorporated FTSC was removed by sequential phenol-chloroform and charcoal extractions, followed by purification using a 8% (w/v) polyacrylamide/7 M urea gel. The excised RNA was eluted at 4°C for 16 h into 1 M NaOAc (pH 4.9), and then subjected to ethanol precipitation. The 3'-labeling efficiency was typically >90%, as assessed by Abs<sub>260</sub> (RNA) and Abs<sub>492</sub> (fluorescein) values.

### Cleavage assays and determination of $k_{app}$

The cleavage reactions with *At*PRORP1 (purified as described in ref. 28) were performed in buffer containing 20 mM HEPES-KOH (pH 7.4), 100 mM NH<sub>4</sub>OAc, 4 mM DTT, 10 mM Mg

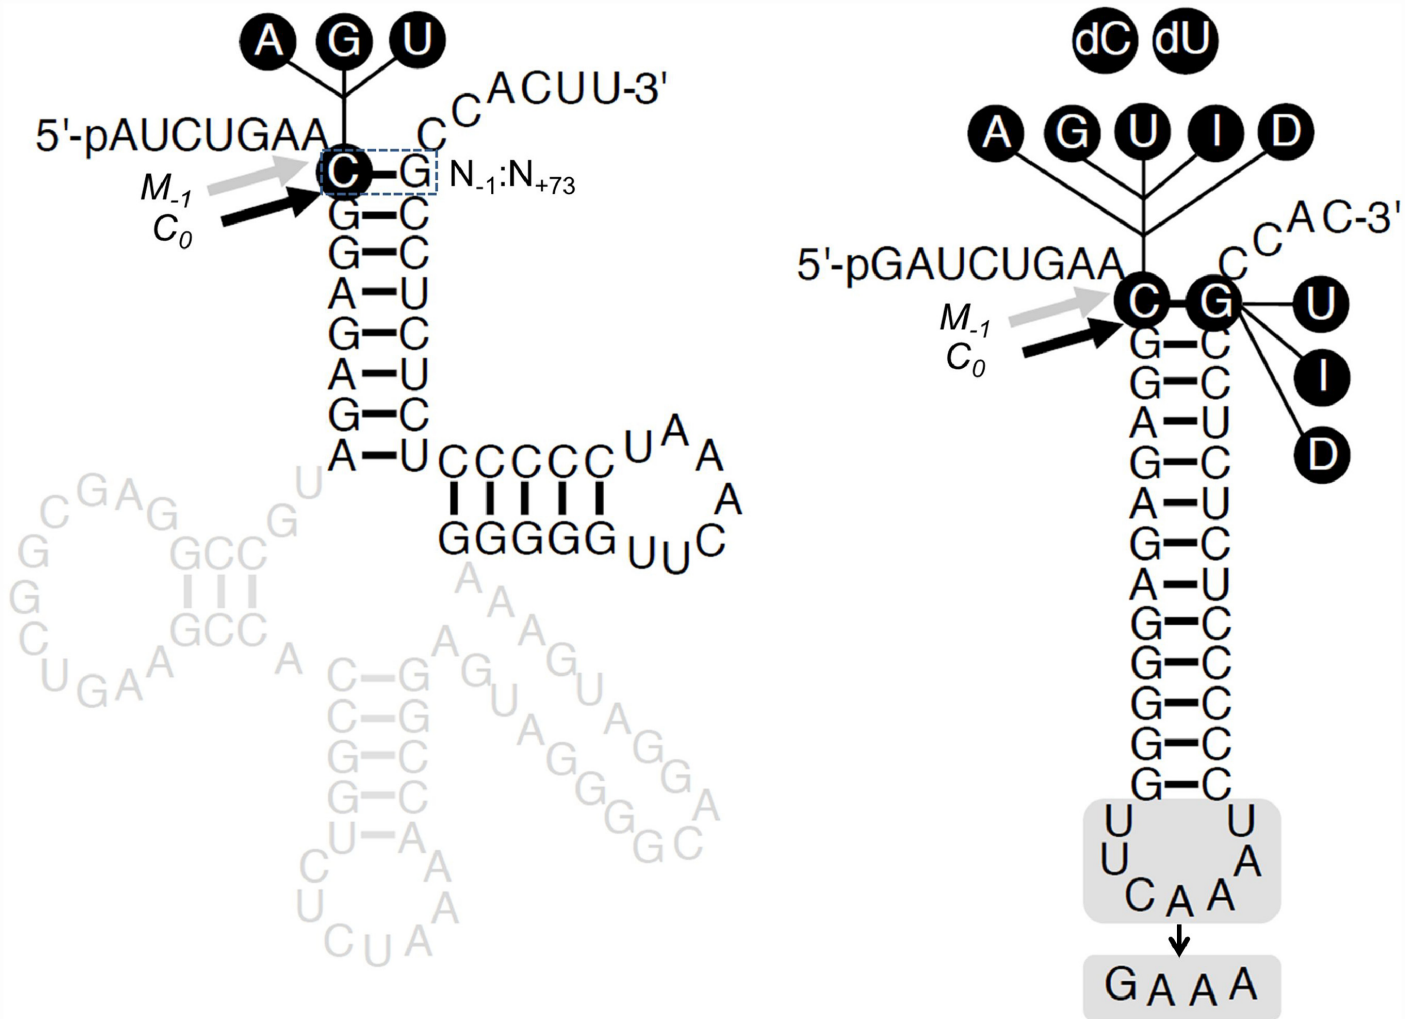

**Fig 1. Secondary structures of substrates used in this study.** Secondary structures of pSu1 and pATSer. The highlighted regions/residues were substituted to generate the different variants as indicated, A, adenosine, G, guanosine, U, uridine, I (Ino), inosine and D (DAP), 2,6-diaminopurine; dC, deoxycytosine; and dU, deoxyuridine. The canonical RNase P cleavage sites between residues  $N_{-1}$  and  $N_{+1}$  (correct cleavage denoted  $C_0$ ), and the alternative cleavage sites between residues  $N_{+2}$  and  $N_{-1}$  (miscleavage denoted as  $M_{-1}$ ) are marked with black and grey arrows, respectively. The  $N_{+73}$  position, which immediately precedes the 3'-terminal CCA-motif, corresponds to the discriminator base.

doi:10.1371/journal.pone.0160246.g001

(OAc)<sub>2</sub> and 0.8 mM spermidine. To determine the optimal  $Mg^{2+}$  concentration for cleavage,  $Mg(OAc)_2$  was added separately to give the final concentration as indicated. All assays were performed at 37°C. The reactions were terminated by adding twice the assay volume of stop solution (10 M urea, 100 mM EDTA), and the products were separated on 25% (w/v) polyacrylamide/7 M urea gels.

The rate constant  $k_{app}$  was determined under single-turnover conditions at pH 7.4 in the presence of 10 mM  $Mg^{2+}$ , which was determined to be optimal for *At*PRORP1-mediated cleavage of pSu1 and pATSerUG. The concentration of *At*PRORP1 used was 0.37  $\mu$ M for assays with pSu1 [except 1.1  $\mu$ M for pSu1(-1C)] and 5.6  $\mu$ M for assays with pATSer derivatives (except 4  $\mu$ M for pATSer 3' truncated variants). The concentrations of *At*PRORP1 used to generate the data are specified in the respective figure legends. The concentration of pSu1 and model substrates was 0.02  $\mu$ M. For rate calculations, we used the 5' cleavage fragment as a measure of product formed. In each assay, the time of incubation was adjusted to ensure that the

velocity measurements were in the linear range (typically  $\leq 10\%$  but never exceeding 40%). Each  $k_{app}$  value is reported as a mean  $\pm$  standard deviation of this value, which were calculated using data (six time points) from at least three independent experiments.

## Fluorescence polarization binding assays and determination of $K_D$ values

Defined amounts of *At*PRORP1, as indicated, were incubated individually with either 2 nM pSu1 or 20 nM pATSer derivatives that had been 3'-labeled with fluorescein [28]. The binding reactions were performed in 20 mM HEPES (pH 7.2), 10 mM Ca(OAc)<sub>2</sub>, 100 mM NH<sub>4</sub>OAc, 4 mM DTT, and 5% (v/v) glycerol. The reactions were carried out for at least 10 min at 22–25°C in a 384-well plate (Corning Costar black round bottom). The fluorescence polarization values were then obtained using infinite M1000 PRO (Tecan), with the G factor set to 1.2. Polarization (P) observed in the presence of different *At*PRORP1 concentrations were subtracted from that observed with the respective substrate alone to obtain  $\Delta P$  at each protein concentration tested. The dissociation constants were then calculated by fitting to  $\Delta P = \frac{\Delta P_{max} \times [AtPRORP1]}{K_D + [AtPRORP1]}$  using KaleidaGraph (Synergy). The curve-fit errors for each measurement did not exceed 26%, with  $R^2$  values  $\geq 0.96$ . Each  $K_D$  value is reported as a mean  $\pm$  standard deviation, which were calculated using data from at least three independent experiments.

## Results

### The identity of $N_{-1}$ in pre-tRNA<sup>Ser</sup> (pSu1) influences cleavage by *At*PRORP1

Studying the recognition and cleavage of a suite of model substrates (pATSer series) derived from *Eco* pre-tRNA<sup>Ser</sup>Su1 (pSu1) by the bacterial RNase P RNP has been gainful [6, 7, 14, 15, 20–22, 29–35]. To facilitate a direct comparison of substrate recognition by the RNP and proteinaceous forms of RNase P, we therefore chose to exploit the same pAT series of model substrates. Moreover, compared to other pre-tRNAs used to study PRORP-mediated cleavage [17, 18, 36], *Eco* tRNA<sup>Ser</sup> is equipped with a longer variable loop thus enabling a comparison of structurally distinct pre-tRNAs. Towards this overall objective, we first investigated if a recombinant *At*PRORP1 could cleave pSu1 [Fig 1; wild type pSu1 referred hereafter as pSu1(-1C)].

*Eco* RPR cleaves pSu1(-1C) predominantly at the canonical correct position between  $N_{-1}$  and  $N_{+1}$  (termed  $C_0$ ), but also miscleaves between  $N_{-2}$  and  $N_{-1}$  (termed  $M_{-j}$ ; Fig 1) [13]. In contrast, *At*PRORP1 cleaved pSu1(-1C) mainly at  $M_{-j}$  but also at  $C_0$  (Fig 2, lane 11; Fig 3A). Interestingly, substitution of  $C_{-1}$  with  $U_{-1}$  or  $A_{-1}$  or  $G_{-1}$  resulted in preferential cleavage at  $C_0$  (Fig 2). Together, these findings suggest that the identity of  $N_{-1}$  and/or pairing between  $N_{-1}$  and the discriminator base (as in  $C_{-1}:G_{73}$ ) play an important role in cleavage-site selection.

Because an examination of the single- and multiple-turnover rates indicated that cleavage (or a preceding step) is likely to be rate limiting for *At*PRORP1 [37], we determined the apparent rates ( $k_{app}$ ) of cleavage for the pSu1 "-1 variants" under single-turnover conditions. We first determined that the optimal  $Mg^{2+}$  concentration for cleavage of pSu1(-1U) by *At*PRORP1 was 10 mM  $Mg^{2+}$  (Fig 4A); we found that the choice of cleavage site did not change with increasing  $Mg^{2+}$ . Hence, we chose 10 mM  $Mg^{2+}$  for the kinetic studies.

When we examined the different model substrates for cleavage at  $C_0$  and  $M_{-j}$ ,  $k_{app}$  showed a three-fold variation with pSu1(-1C) being the weakest substrate. In contrast,  $k_{app}$  for cleavage at  $M_{-j}$  (the incorrect site) was roughly 20-fold higher for pSu1(-1C) compared to the other three  $N_{-1}$  variants (Table 1) consistent with its miscleavage propensity. Irrespective of the



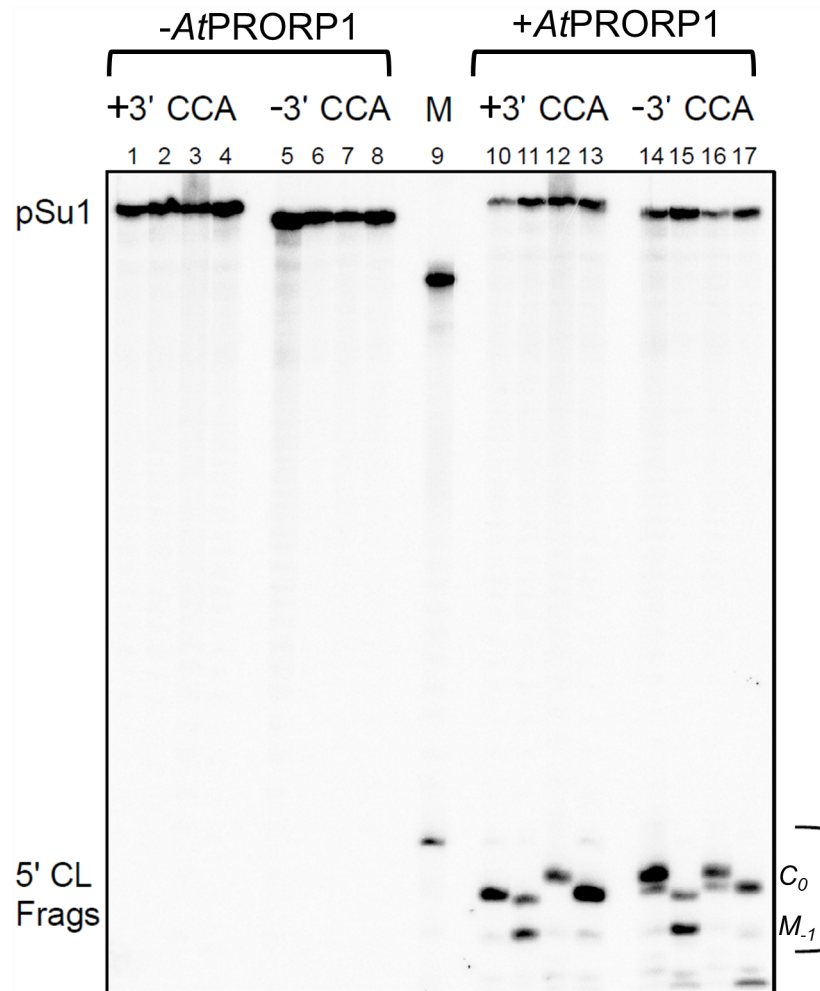

**Fig 2. AtPRORP1-mediated cleavage of pre-tRNA<sup>Ser</sup>Su1 (pSu1).** Representative gel showing AtPRORP1-mediated cleavage of pre-tRNA<sup>Ser</sup>Su1 (pSu1) substrates with and without the 3' CCA. Lanes 1 to 8 represent negative controls (absence of AtPRORP1), and M (size marker, lane 9) indicates cleavage of pATSerUG by *Eco* RPR. Note that this cleavage generates a 5' cleavage fragment (5' CL Frags) one nucleotide longer compared to that generated during cleavage of pSu1. Lanes 10 and 14 pSu1(-1A), lanes 11 and 15 pSu1(-1C), lanes 12 and 16 pSu1(-1G), and lanes 13 and 17 pSu1(-1U). The final concentration of AtPRORP1 was 0.37  $\mu$ M and the reactions were performed at 37°C for 30 s in the presence of 10 mM Mg<sup>2+</sup> (see [Materials and Methods](#)).

doi:10.1371/journal.pone.0160246.g002

substrate tested, the frequency of cleavage at  $M_{-1}$  and  $C_0$  did not change as a function of time (not shown).

**The 3'-CCA in pre-tRNA<sup>Ser</sup> (pSu1) is not a major determinant for cleavage by AtPRORP1**  
*Eco* pSu1 has a 3' terminal CCA-motif (Fig 1). However, eukaryotic and organellar tRNA genes in general do not encode CCA (see e.g. <http://trna.ie.niigata-u.ac.jp/cgi-bin/trnadb/index.cgi>). When we analyzed the organellar tRNA sequences for 8 algal and plant species (available at <http://plantrna.ibmp.cnrs.fr>), only 0.5% (2 out of 423) tRNA-encoding genes have a 3'-CCA: a chloroplast tRNA<sup>Ala</sup> in *Cyanophora paradoxa* and a mitochondrial tRNA<sup>Ile</sup> in *Solanum tuberosum* (potato). Thus, AtPRORP1-localized to the mitochondria and chloroplasts—may not encounter pre-tRNAs with 3'-CCA.

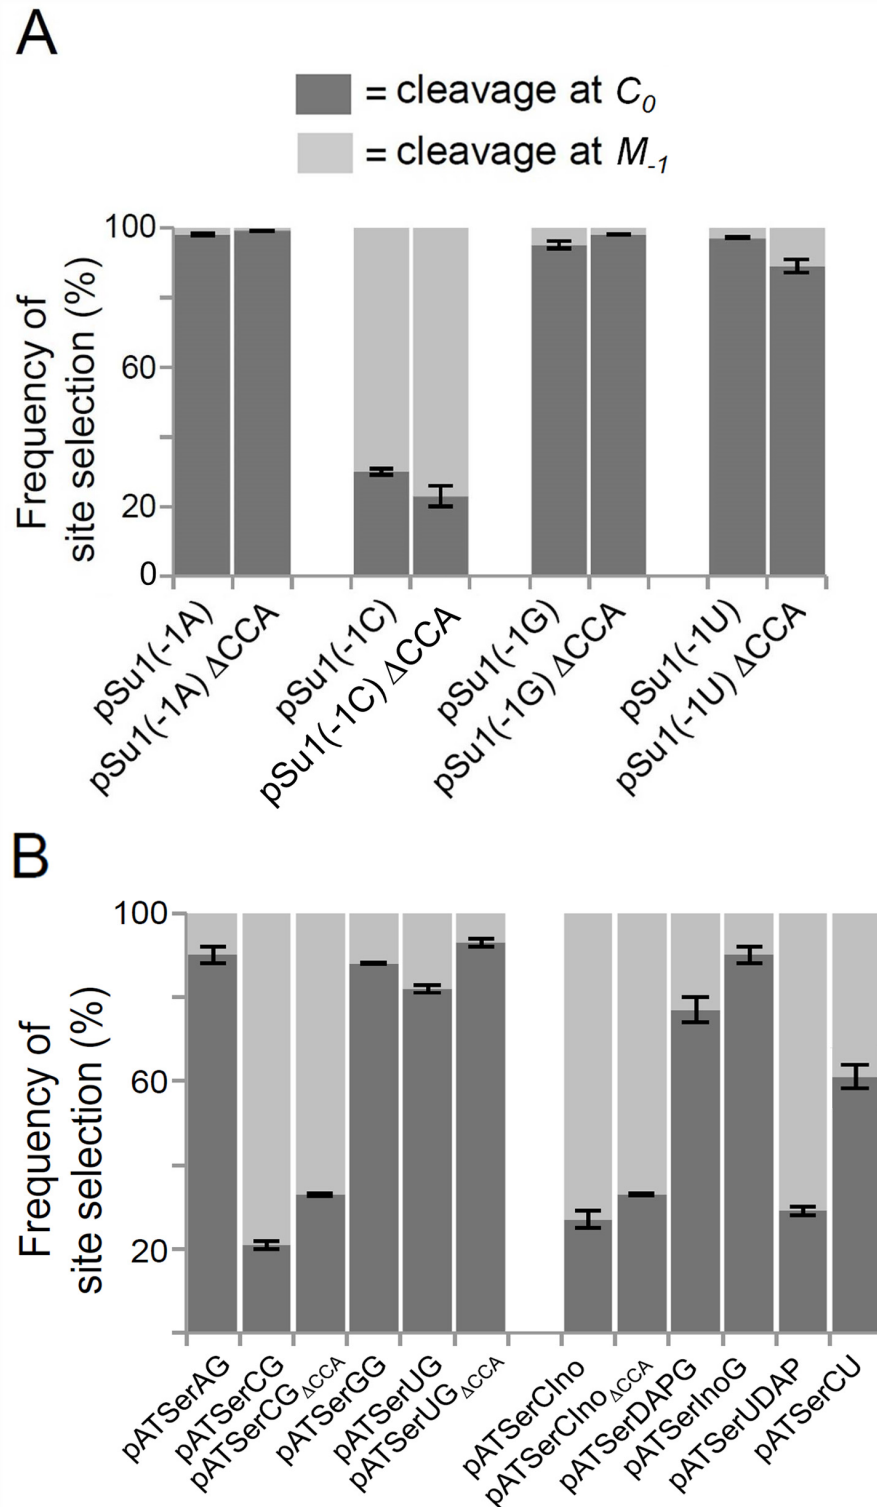

**Fig 3. Frequencies of cleavage-site selection by *AtPRORP1*.** Histograms summarizing cleavage-site selection frequencies (in %) during *AtPRORP1*-mediated cleavage of pSu1 "-1" (A) and pATSer (B) variants. Mean and standard deviation values were calculated using data from at least three independent experiments.

doi:10.1371/journal.pone.0160246.g003

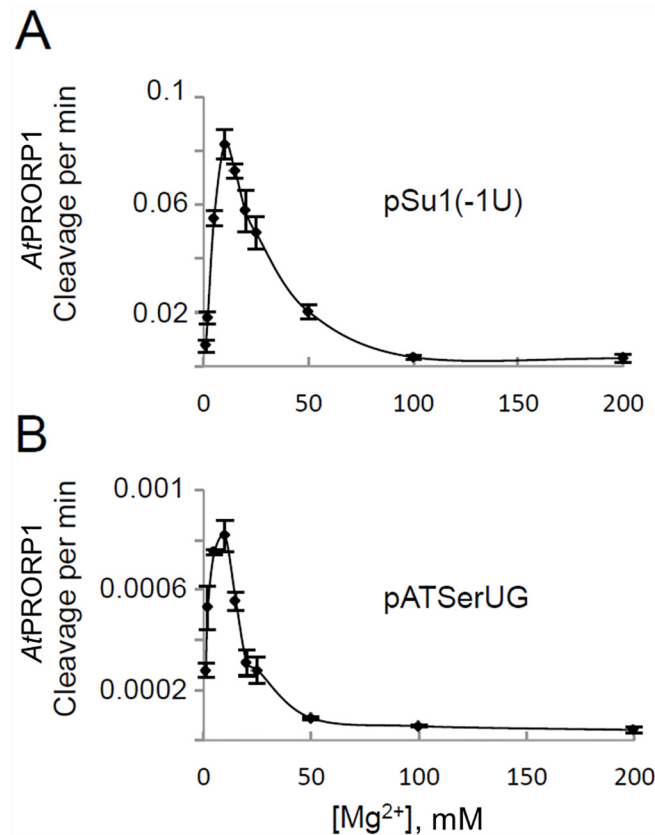

**Fig 4. Effect of varying Mg<sup>2+</sup> concentration on AtPRORP1-mediated cleavage.** AtPRORP1-mediated cleavage of the pSu1(-1U) (A) and pATSerUG (B) as a function of Mg<sup>2+</sup> concentration at 37°C. Mean and standard deviation values were calculated using data from at least three independent experiments.

doi:10.1371/journal.pone.0160246.g004

Although the inference was drawn from a single end-point measurement, it was previously reported that the presence of the 3'-CCA in pre-tRNA decreases AtPRORP1 cleavage and might therefore serve as an anti-determinant [9]. We therefore generated truncated pSu1 "-1 variants", which lack this CCA-motif (Fig 1), and assessed their fidelity and rate of cleavage by AtPRORP1 (Fig 2, lanes 14 to 17; Fig 3A and Table 1). With respect to cleavage site-selection, we did not observe any major difference with and without the 3'-CCA, if anything a small increase in cleavage at M<sub>-1</sub> for pSu1(-1C) and pSu1(-1U) in the absence 3'-CCA (Fig 3A). Upon deletion of the 3'-CCA motif, we noted a modest increase in k<sub>app</sub> (at C<sub>0</sub>) for substrates having A<sub>-1</sub> or G<sub>-1</sub>, while a decrease was detected for those with C<sub>-1</sub> or U<sub>-1</sub>. The most striking effect was a 3.5-fold decrease in k<sub>app</sub> for cleavage of pSu1(-1U) at C<sub>0</sub> (Table 1). A simple classification that the 3'-CCA motif acts as a positive or negative determinant is not possible given the substrate-context effects.

### Cleavage of model hairpin loop substrates by AtPRORP1

We next investigated whether AtPRORP1 cleaves the model hairpin loop substrate pATSerCG, which is composed of the 5' leader, the amino acid acceptor-stem (with the 3' CCA-motif and a dangling 3'C), and the T-stem and loop of pSu1(-1C) (Fig 1). Indeed, pATSerCG acts as a substrate for AtPRORP1 (Fig 5, lane 9), and as expected based on the fidelity of processing of pSu1(-1C), pATSerCG was also cleaved mainly at M<sub>-1</sub> (Fig 3B). Substitution of C at -1 with



**Table 1. Rate of cleavage ( $k_{app}$ ) of pSu1 and pATSer variants at 10 mM  $Mg^{2+}$ .**

| Substrate                                 | Cleavage site | $k_{app}$ ( $min^{-1}$ ) With 3'-CCA | $k_{app}$ ( $min^{-1}$ ) Without 3'-CCA |
|-------------------------------------------|---------------|--------------------------------------|-----------------------------------------|
| pSu1(-1C)                                 | $C_0$         | 0.5±0.01                             | 0.25±0.005                              |
|                                           | $M_{-1}$      | 0.7±0.01                             | 0.5±0.01                                |
| pSu1(-1A)                                 | $C_0$         | 1.6±0.01                             | 2.5±0.1                                 |
|                                           | $M_{-1}$      | 0.04±0.0004                          | 0.02±0.001                              |
| pSu1(-1G)                                 | $C_0$         | 0.8±0.004                            | 2±0.07                                  |
|                                           | $M_{-1}$      | 0.03±0.001                           | 0.02±0.0004                             |
| pSu1(-1U)                                 | $C_0$         | 1.4±0.08                             | 0.4±0.01                                |
|                                           | $M_{-1}$      | 0.03±0.003                           | 0.03±0.003                              |
| pATSerCG <sup>#</sup>                     | $C_0$         | 0.0002±0.00003                       | 0.0012±0.00001                          |
|                                           | $M_{-1}$      | 0.0008±0.00005                       | 0.0022±0.0001                           |
| pATSerUG <sup>#</sup>                     | $C_0$         | 0.0013±0.00005                       | 0.0034±0.0002                           |
|                                           | $M_{-1}$      | 0.0002±0.000005                      | 0.00035±0.00005                         |
| pATSerCIno <sup>#</sup>                   | $C_0$         | 0.0004±0.000001                      | 0.001±0.00005                           |
|                                           | $M_{-1}$      | 0.0012±0.00001                       | 0.0019±0.00002                          |
| pATSerCU <sup>#</sup>                     | $C_0$         | 0.002±0.00005                        | ND                                      |
|                                           | $M_{-1}$      | 0.0014±0.00002                       | ND                                      |
| pATSerUG <sup>##</sup>                    | $C_0$         | 0.0009±0.0001                        | NA                                      |
| pATSerUG $_{\Delta 3'AC}$ <sup>##</sup>   | $C_0$         | 0.0006±0.00004                       | NA                                      |
| pATSerUG $_{\Delta 3'CAC}$ <sup>##</sup>  | $C_0$         | 0.001±0.0001                         | NA                                      |
| pATSerUG $_{\Delta 3'CCAC}$ <sup>##</sup> | $C_0$         | 0.003±0.0008                         | NA                                      |

Each value listed is a mean ± standard deviation determined from three or more independent experiments.

<sup>#</sup>C and U correspond to residue identity at the -1 position while G, Ino (inosine) and U refer to residue identity at the discriminator position "+73" (numbering same as in tRNA; Fig 1).

<sup>##</sup> $k_{app}$  values determined at 25 mM  $Mg^{2+}$  for these substrates. While these experiments were performed prior to our establishing 10 mM  $Mg^{2+}$  as being optimal, the rate and fidelity of cleavage is largely unchanged between 10 to 25 mM  $Mg^{2+}$ .  $\Delta 3'AC$ ,  $\Delta 3'CAC$  and  $\Delta 3'CCAC$  indicates residues in the 3'CCAC motif that were deleted. ND, not determined; NA, not applicable.

doi:10.1371/journal.pone.0160246.t001

U (pATSerUG with and without the 3'-CCA-motif) shifted the major cleavage site to  $C_0$ , again reminiscent of pSu1(-1U) (Fig 5; see also Fig 3B and Fig A in S1 File). Clearly, at least the determinants for cleavage-site selection are all preserved in the simpler model substrate. In fact, even the optimal [ $Mg^{2+}$ ] of 10 mM that we determined for cleavage of pATSerUG parallels that for pSu1(-1U) (Fig 4B).

The rates of cleavage ( $k_{app}$ ) of pATSerCG and pATSerUG at 10 mM  $Mg^{2+}$  were dramatically lower than their pSu1 counterparts (Table 1). For pATSerCG, the  $C_0$  and  $M_{-1}$  rates are 2500- and almost 900-fold lower, respectively, while for pATSerUG cleavage at  $C_0$  was three orders of magnitude lower. Deleting the 3'-CCA-motif resulted in a modest increase in  $k_{app}$  for both pATSerCG and pATSerUG. In this context, note that deletion of both C's and the 3' terminal A is needed to elicit a modest increase in  $k_{app}$  (Table 1).

Despite weak cleavage of the model substrates, compared to the parental pre-tRNA, the qualitative trends with respect to cleavage-site selection are similar for pSu1 and the pATSer  $N_{-1}$  variants (Fig 3). For example, comparison of pSu1(-1C) and pATSerCG (both without 3'-CCA) reveals that the  $k_{app}$  for cleavage at  $M_{-1}$  relative to  $C_0$  is two-fold greater in each case (Table 1). For the same cohort with 3'-CCA, the  $k_{app}$  for cleavage at  $M_{-1}$  relative to  $C_0$  is 1.4-fold higher for pSu1(-1C) and four-fold for pATSerCG (Table 1).

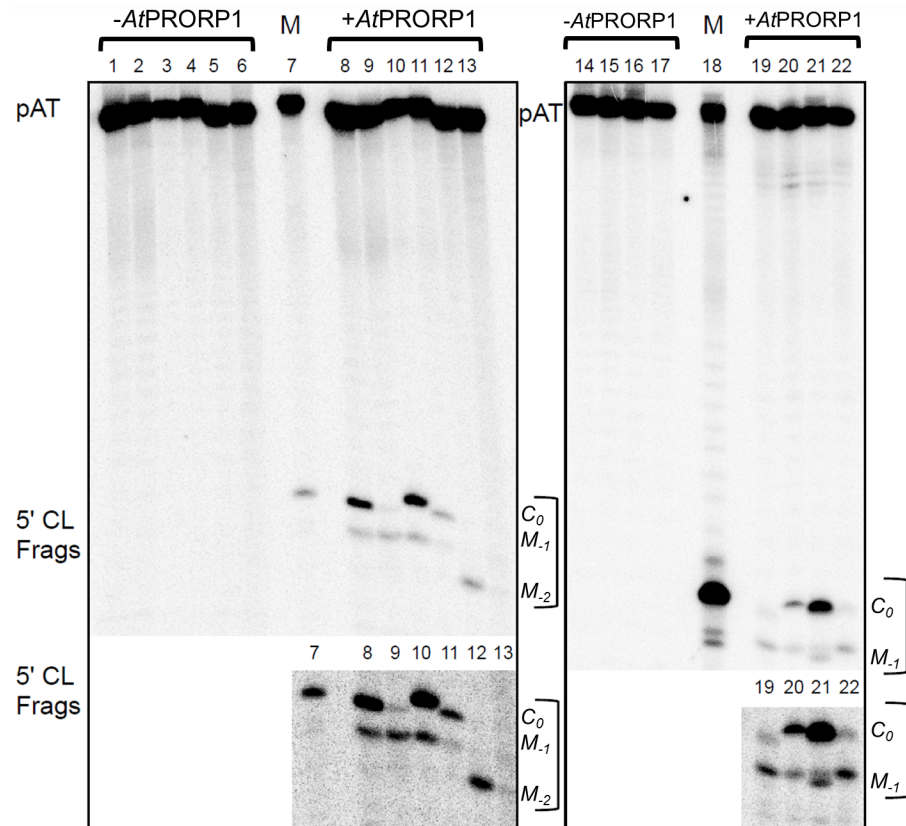

**Fig 5. AtPRORP1-mediated cleavage of pATSer variants.** Representative gel showing AtPRORP1-mediated cleavage of 3' CCA-motif-containing pATSer variants. Lanes 1 to 6 and 14 to 17 are negative controls (loaded in the same order as the reactions with AtPRORP1 in lanes 8 to 13 and 19 to 22, respectively); and lanes 7 and 18 (size marker) refers to cleavage of pATSerUG by Eco RPR. The final concentration of AtPRORP1 was 6.6  $\mu\text{M}$  and the reactions were performed at 37°C for 60 min in the presence of 10 mM  $\text{Mg}^{2+}$ . The position of each 5' cleavage fragment (5' CL Frags) generated after cleavage is indicated. The two lower panels represent overexposure to better highlight the 5'-cleavage products in the upper panels. (Note: Fig A in S1 File shows cleavage of pATSer derivatives without the 3' CCA-motif.)

doi:10.1371/journal.pone.0160246.g005

### Hairpin loop substrate binds with lower affinity than pre-tRNAs to AtPRORP1

We next used a previously described fluorescence polarization assay [38] to determine the dissociation constants ( $K_D$  values) for the binding of 3'-CCA-containing pATSerUG and pSu1 (-1U) to AtPRORP1. These binding reactions were performed in the presence of  $\text{Ca}^{2+}$ , because

**Table 2. Binding constants ( $K_D$ ) for pSu1(-1U), pATSerUG and pATSerUG<sub>GAAA</sub>.**

| Substrate                | $K_D$ , $\mu\text{M}$ | $\Delta\Delta G$ , kcal/mol |
|--------------------------|-----------------------|-----------------------------|
| pSu1(-1U)                | 0.0063±0.0026         | 1                           |
| pATSerUG                 | 1.2±0.067             | -3.2                        |
| pATSerUG <sub>GAAA</sub> | 0.93±0.18             | -3.1                        |

$K_D$  values were determined at 10 mM  $\text{Ca}^{2+}$  and 25°C. Each  $K_D$  value is an average of at least three independent experiments.  $\Delta\Delta G$  values were calculated using the equation  $\Delta\Delta G = -RT \ln [K_D(\text{pATSerUG or pATSerUG}_{GAAA})/K_D(\text{pSu1}(-1U))]$  [40].

doi:10.1371/journal.pone.0160246.t002

*AtPRORP1* shows tight pre-tRNA binding but no detectable cleavage when  $Mg^{2+}$  is substituted with  $Ca^{2+}$  [28, 38]. The  $K_D$  value for pATSerUG increased by almost 200-fold relative to pSu1 (-1U) (Table 2; see also Fig B in S1 File). This change, which corresponds to a loss of 3.2 kcal/mol in binding, reflects the importance of the D stem-loop, and perhaps the T-/D-loop tertiary contacts, for tight substrate binding by *AtPRORP1*. The model substrate also lacks the anticodon stem-loop, but this structural element has been shown to be dispensable for substrate recognition and cleavage by the RNP and *AtPRORP* forms of RNase P [4, 6, 9, 13, 20, 39].

**$C_{-1}$  and  $N_{-1}:N_{+73}$  pairing influence cleavage by *AtPRORP1*.** Our results show that  $N_{-1}$  identity influences cleavage by *AtPRORP1*, as is particularly evident from results obtained with  $C_{-1}$  substrates that were cleaved preferentially at the alternative site  $M_{-1}$  (miscleavage). Both pSu1 and pATSer have  $G_{+73}$  as the discriminator base, and therefore have the possibility of  $C_{-1}:G_{+73}$  pairing. Thus, the bp just upstream of the correct cleavage site could affect fidelity and rate. To investigate this possibility, we next generated pATSer variants with different  $N_{-1}:N_{+73}$  options (Fig 1). These substrates are referred to as pATSerAG, pATSerGG, pATSerCIno (inosine at +73 can potentially form two H-bonds with  $C_{-1}$ ), pATSerDAPG (2,6-diamino purine at -1), pATSerInoG (inosine at -1), pATSerUDAP (2,6-diamino purine at +73 can potentially form three H-bonds with  $U_{-1}$ ) and pATSerCU.

The cleavage data (Figs 3 and 5) showed that pATSer acts as an *AtPRORP1* substrate irrespective of the identity of residue -1. While substrates having  $A_{-1}$ ,  $G_{-1}$ ,  $DAP_{-1}$ ,  $Ino_{-1}$  and  $U_{-1}$  (except for pATSerUDAP) were cleaved preferentially at the correct site,  $C_{-1}$  resulted in cleavage at  $M_{-1}$  even when it is not engaged in pairing with  $N_{+73}$  as evident from cleavage of pATSerCU (Fig 3B). Moreover, formation of a  $N_{-1}:N_{+73}$  pair with three H-bonds resulted in cleavage mainly at the alternative site  $M_{-1}$  (see pATSerCG and pATSerUDAP). Together, these data suggest that  $C_{-1}$  as well as the presence of a  $N_{-1}:N_{+73}$  pair with three H-bonds in a pATSer context influence the choice of cleavage site by *AtPRORP1*. Consistent with these findings, the  $k_{app}$  for pATSerCU (absence of the -1/+73 pair) was ten-fold higher for cleavage at the correct site compared to pATSerCG while it was two-fold higher for pATSerCIno (Table 1).

Since our findings indicated that  $N_{-1}$  identity and the strength of the  $N_{-1}:N_{+73}$  pair play important roles in determining the rate and fidelity of cleavage, and that some combinations result in adverse effects with respect to *AtPRORP1* catalysis, we postulated that a bias might become apparent from an analysis of the  $N_{-1}:N_{+73}$  sequence information among the organellar tRNAs in eight different green algae and plants (Fig 6; Table A in S1 File). From examining these 423 tRNAs, we observed the following features. First,  $C_{-1}:G_{+73}$  was present in only 0.7% of the tRNAs (3 instances) even though  $C_{-1}$  displayed a 10-fold higher incidence (7.6%, 32 out of 423). Second, there were eight examples of  $G_{-1}:C_{+73}$  (~2%), but seven of these were tRNA<sup>His</sup>; a universal identity determinant of tRNA<sup>His</sup> for histidyl-tRNA synthetase is the presence of  $G_{-1}$  and an 8-bp acceptor stem. Last, there is a variable distribution of other pairing possibilities:  $A_{-1}:U_{+73}$  (6.4%),  $U_{-1}:A_{+73}$  (18.2%) and  $G_{-1}:U_{+73}$  (2.4%). Although an in-depth analysis is needed to draw firm conclusions, it appears that two hydrogen bonds in the  $N_{-1}:N_{+73}$  pair alone might not engender miscleavage, especially when  $N_{-1}$  is not a C. A better understanding of cleavage-site selection as well as the biological specificity of PRORP *in vivo* requires determining the  $k_{cat}/K_m$  for cleavage (at  $C_0$  and  $M_{-1}$ ) of different pre-tRNAs that exemplify the natural variations.

### Role of the 2'-OH at $N_{-1}$ in cleavage by *AtPRORP1*

The 2'-OH at  $N_{-1}$  in pATSer plays an important role for *Eco* RPR-mediated cleavage at the correct site [32, 33]. For comparison, we therefore decided to study *AtPRORP1* cleavage of pATSer variants in which the 2'-OH at  $N_{-1}$  was replaced with 2'-H (deoxy). These variants,

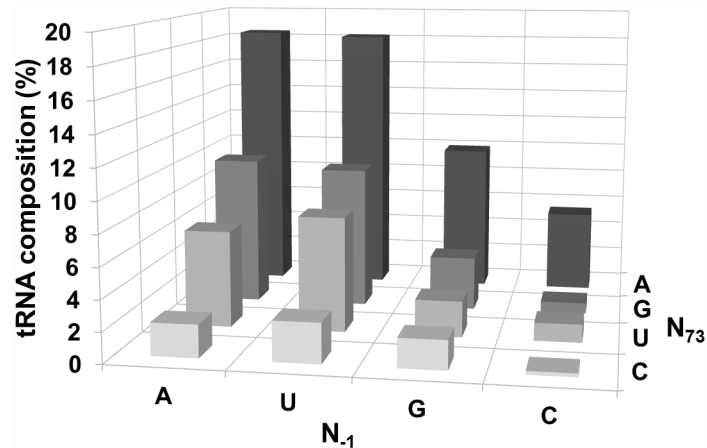

**Fig 6. Analysis of N<sub>1</sub>:N<sub>73</sub> identities in mitochondrial and chloroplast tRNAs.** Analysis of N<sub>1</sub>:N<sub>73</sub> identities in 423 mitochondrial and chloroplast tRNAs from eight different green algae and plants (sequences obtained from <http://plantrna.ibmp.cnrs.fr/>). Table A in [S1 file](#) lists the individual distributions in each species.

doi:10.1371/journal.pone.0160246.g006

pATSerU<sub>deoxy</sub>G and pATSerC<sub>deoxy</sub>G (Fig 1), were subjected to cleavage by AtPRORP1. For the variants carrying 2'-H at N<sub>1</sub>, we did not detect any cleavage at any position (Fig C in [S1 File](#)). This result is in contrast to what has been reported for *Eco* RPR-mediated cleavage of the same substrates (see [Discussion](#)).

### Role of the pATSer loop in cleavage by AtPRORP1

Since the structure of the pATSerCG loop (corresponding to the T-loop in pSu1; Fig 1) influences cleavage efficiency and cleavage site-selection in *Eco* RPR-mediated cleavage [21, 22], we tested the significance of the loop for AtPRORP1 catalysis. Indeed, replacing the loop in both pATSerCG and pATSerUG with a GAAA-tetraloop reduced cleavage efficiency dramatically (Fig 5 lanes 12 and 13). We detected cleavage at M<sub>2</sub> (between residues -1 and -2) and no cleavage at either C<sub>0</sub> or M<sub>1</sub> for pATSerCG<sub>GAAA</sub>, and very little cleavage at M<sub>2</sub> (if any) or any other position for pATSerUG<sub>GAAA</sub>. For both these substrates we were unable to determine k<sub>app</sub>. Interestingly, comparing the K<sub>D</sub> values for pATSerUG and pATSerUG<sub>GAAA</sub> revealed that AtPRORP1 binds both these substrates with roughly equal affinity (Table 2). Collectively, these data suggested that the structure of the loop in pATSer influences cleavage efficiency and site recognition but not binding.

## Discussion

### Requirements for efficient and accurate cleavage by AtPRORP1

In addition to pre-tRNAs, PRORPs from various sources are capable of processing mRNAs, tRNA-like molecules called t-elements, and snoRNAs [9, 41, 42]. Here, we investigated processing of mutant derivatives of pre-tRNA<sup>Ser</sup>(Su1)-based substrates by AtPRORP1 and interpret here the experimentally observed nucleobase preferences with identity biases in the sequences of organellar tRNAs. We have also drawn collectively from two recent complementary reports: Brillante *et al.* used AtPRORP3 and *Thermus thermophilus* (*Tth*) pre-tRNA<sup>Gly</sup>, and Howard *et al.* compared AtPRORP1, AtPRORP2 and AtPRORP3 for their ability to process both nuclear and organellar pre-tRNAs (including *Arabidopsis* mitochondrial pre-tRNA<sup>Cys</sup>) [17, 18]. Overall, these results are expected to contribute to an understanding of the

versatility of PRORPs, comparison of substrate-recognition by PRORP and RNP-based RNase P, and possibly the driving force for evolution of the two forms.

First, we showed that *At*PRORP1 cleaves *Eco* pre-tRNA<sup>Ser</sup>(pSu1) that has a large variable loop, a structural feature that is known to affect the structural topography in the vicinity of the T-/D-loop region [43]. We investigated pSu1 since previous studies with PRORP variants used pre-tRNAs with smaller variable loops (e.g., pre-tRNA<sup>Tyr</sup>, pre-tRNA<sup>Phe</sup>, pre-tRNA<sup>Gly</sup>, pre-tRNA<sup>Cys</sup> [8, 9, 17, 18, 28, 29]).

Second, we demonstrate here that *At*PRORP1 cleaves model hairpin-loop substrates (45-nt pATSer variants) at least 1000-fold slower than the parental pre-tRNA<sup>Ser</sup> (Table 1). Our finding is consistent with the >1000-fold decrease reported for *At*PRORP1-mediated processing of an *Arabidopsis* mitochondrial pre-tRNA<sup>Cys</sup>-derived stem-loop substrate compared to pre-tRNA<sup>Cys</sup> [18]; this decrease was less pronounced with *At*PRORP2 and *At*PRORP3 (30- and 67-fold, respectively). Brillante et al. independently reported a 26-fold lower rate for *At*PRORP3-mediated cleavage of a *Tth* pre-tRNA<sup>Gly</sup>-derived stem-loop substrate relative to pre-tRNA<sup>Gly</sup> [17]. Given the striking similarity of the tertiary structures of *At*PRORP1 and *At*PRORP2 [38, 44], their differences in processing stem-loop substrates is surprising. Our observations on *At*PRORP1 contrast with bacterial RNase P, where the RPR with or without its protein cofactor exhibits only a two- to ten-fold lower activity with a "pAT-type" model substrate compared to its corresponding parental pre-tRNA or even with pre-4.5S RNA [4, 21, 45]. Although these findings suggest that *At*PRORP1 might not be capable of efficiently processing substrates such as *Eco* pre-4.5S RNA [45, 46], which resembles pATSer, expression of *At*PRORP1 in an *E. coli* strain that is temperature sensitive (ts) for RNase P activity resulted in growth at the non-permissive temperature [9].

Third, our data suggest that N<sub>-1</sub> in the substrate contributes to cleavage efficiency of and site selection by *At*PRORP1 (Table 1). Specifically, C<sub>-1</sub> decreased the cleavage frequency at C<sub>0</sub> both in the context of pSu1 and pATSer substrates (Fig 3). We consider two possibilities why C<sub>-1</sub> might interfere with correct cleavage: (i) the exocyclic amine in C<sub>-1</sub> base results in unfavorable positioning in the *At*PRORP1 active site; and (ii) formation of a C<sub>-1</sub>:G<sub>+73</sub> bp imposes a barrier for exposing the C<sub>0</sub> cleavage site, as has been suggested for bacterial RPR [14, 15, 29]. To evaluate these postulates, it is instructive to compare the frequency and rates of miscleavage of pATSerCG (C<sub>-1</sub>:G<sub>+73</sub>), pATSerCIno (C<sub>-1</sub>:I<sub>+73</sub>) and pATSerCU (C<sub>-1</sub>:U<sub>+73</sub>). With these three C<sub>-1</sub> substrates, we notice a trend towards increasing correct cleavage and a higher overall rate as we transition from three to two to zero hydrogen bonds between N<sub>-1</sub> and N<sub>+73</sub>; the four-fold higher preference for miscleavage with pATSerCG shifts to a 1.4-fold preference for correct cleavage with pATSerCU (Fig 3B; Table 1). Thus, both the identity and the strength of the bp at N<sub>-1</sub>:N<sub>+73</sub> are important in cleavage-site selection. A few additional comments in this regard: *At*PRORP1 cleaves chloroplast pre-tRNA<sup>Phe</sup> with a C<sub>-1</sub>:A<sub>+73</sub> at C<sub>0</sub> with >95% and *Tth* pre-tRNA<sup>Gly</sup> with a C<sub>-1</sub>:U<sub>+73</sub> only at C<sub>0</sub> [18, 29]. In contrast, we find miscleavage (40% of total; Fig 3B) of pATSerCU; akin to the other reports, we find a bias towards correct cleavage. However, it is clear that the impact of C<sub>-1</sub> appears to be dependent on context and other structural elements (for instance, shorter D and variable loops in chloroplast pre-tRNA<sup>Phe</sup> and *Tth* pre-tRNA<sup>Gly</sup>, and a larger variable loop in *Eco* pSu1). Further support for this postulate stems from our sequence analyses (Fig 6; Table B in S1 File). While we noticed a negative bias for C<sub>-1</sub>:G<sub>+73</sub> in that there were only 0.7% organellar tRNAs from eight different algae/plants, nearly 8% of the total suite have C<sub>-1</sub>. We recognize that tRNA nucleobase identities coevolve with a suite of tRNA processing and modification enzymes, including RNase P. As far as *At*PRORP1 is concerned, while C<sub>-1</sub>:G<sub>+73</sub> is clearly not preferred, C<sub>-1</sub> alone might be tolerated depending on the N<sub>+73</sub> identity and other structural elements (Fig 6; Table A in S1 File; see below).



Fourth, replacement of the 2'-OH with 2'-H at  $N_{-1}$  in pATSer resulted in no detectable cleavage by *At*PRORP1 at site  $C_0$  (Fig C in [S1 File](#)). Because *At*PRORP1 depends on  $Mg^{2+}$  ions for activity [36–38], the 2'-OH at  $N_{-1}$  might influence positioning of functional important  $Mg^{2+}$  in the active site, as was noted earlier for bacterial RPR catalysis [31–33, 47–52]. *Eco* RPR cleaves pATSer $C_{deoxy}G$  almost exclusively at  $M_{-1}$  while pATSer $U_{deoxy}G$  is cleaved preferentially at  $C_0$  [31, 32; Mao and Kirsebom, unpublished data]. Hence, cleavage with *At*PRORP1 somewhat resembles the scenario with the bacterial counterpart but the identity of  $N_{-1}$  influences the magnitude of the decrease at  $C_0$  with bacterial RPR.

Fifth, we discovered that there is little interplay between  $N_{-1}$  and  $N_{+1}$  in cleavage-site selection by *At*PRORP1, a notable difference compared to bacterial RNase P.  $G_{-1}$ -containing pSu1 and pATSer variants are cleaved with a high frequency at  $M_{-1}$  by bacterial RPR. This is particularly true for substrates having  $G_{-1}:C_{73}$  (e.g. pre-tRNA<sup>His</sup>) [14, 15, 31, 53–57; Mao and Kirsebom, unpublished data].  $G_{+1}$ , which has been suggested to help position the nucleophile during RNase P-mediated cleavage, is indeed present in a majority of bacterial tRNAs (see e.g., <http://trna.ie.niigata-u.ac.jp/cgi-bin/trnadb/index.cgi>) [34, 49, 58]. Thus, the presence of  $G_{-1}$  leads to increased cleavage at  $M_{-1}$  [15], likely due to metal-ion or other anchoring determinants now being present at both  $G_{+1}$  and  $G_{-1}$ . Although organellar tRNAs from the eight green algae and plants that we analyzed also favor  $G_{+1}$  (nearly 75% bias; Table B in [S1 File](#)), it appears that *At*PRORP1 might not rely on  $G_{+1}$  as a guide for cleavage-site selection. Unlike bacterial RPR, which cleaves pSu1 and pATSer (having  $G_{-1}$  and  $G_{+1}$ ) at the incorrect site with either higher or similar frequencies as substrate counterparts with  $C_{-1}$  [14, 15; Mao and Kirsebom, unpublished data], *At*PRORP1 cleaved a  $G_{-1}$  substrate mainly at the correct site  $C_0$  [for example, see pSu1 (-1G), [Fig 2](#)]. However, there is a hierarchy in cleavage-site selection by PRORPs, with contributions from multiple factors such as  $N_{-1}$  identity and the  $N_{-1}:N_{+73}$  bp (especially, a  $G_{-1}:C_{+73}$  bp) as evident from the following observations. In spinach chloroplast pre-tRNA<sup>His</sup>,  $G_{-1}$  is encoded in the gene; 5' processing of this precursor using a spinach S100 extract results in a 5'-matured tRNA<sup>His</sup> with  $G_{-1}$  [59]; similarly, recombinant *At*PRORP1 cleaved potato tRNA<sup>His</sup> predominantly between  $G_{-2}$  and  $G_{-1}$  [60]. This scenario with plants contrasts with yeast tRNA<sup>His</sup>, where  $G_{-1}$  is added after RNase P processing [61]. Also, *At*PRORP1, *At*PRORP2 and *At*PRORP3 mis-cleave (at a frequency ranging from 28% to 72%) *A. thaliana* nuclear pre-tRNA<sup>Phe</sup> with  $U_{-1}:A_{73}$  [18]. Swapping the native  $C_{-1}:U_{73}$  in pre-tRNA<sup>Gly</sup> to  $G_{-1}:C_{73}$  led to 100% mis-cleavage at  $M_{-1}$  by *At*PRORP3 [17].

Sixth, comparing the  $K_D$  and  $k_{app}$  values, respectively, for binding and cleavage of pre-tRNA<sup>Ser</sup>Su1 and pATSerUG by *At*PRORP1 revealed the importance of the D-loop, the variable loop and the anticodon stem and loop ([Fig 5](#) and [Fig A](#) in [S1 File](#); [Table 2](#)). Replacement of the native T-loop (seven nt) with a GAAA tetraloop in pATSer did not affect binding but eliminated cleavage at the correct position  $C_0$  for both the  $C_{-1}$  and  $U_{-1}$  variants ([Table 2](#)). Hence, at least for cleavage of model hairpin-loop substrates, the T-loop equivalent contributes to the rate and fidelity but not binding. Our observations, which emphasize the importance of the T-/D-loop region for binding and processing by *At*PRORP1, are consistent with findings from earlier studies. Substitution of residues at positions 18 or 19 in the D-loop, or 56, 57 or 58 in the T-loop influenced the cleavage efficiency of *At*PRORP1 [9, 62]. A substrate in which the anticodon stem and loop is deleted was cleaved with high efficiency, whereas removal of the D-loop resulted in an RNA for which no detectable cleavage was observed [9]. Footprinting analysis of pre-tRNA<sup>Cys</sup> further indicated that U16, G18, G19 (D-loop) and C56 (T-loop) are protected when bound to *At*PRORP1 [11]. Moreover, the  $K_{M(STO)}$  and  $k_{react}$  (kinetic constants determined under single turn over) of *At*PRORP3-mediated processing of pre-tRNA<sup>Gly</sup> decreased by 1200- and 26-fold, respectively, upon deletion of the D-stem-loop and anticodon stem-loop [17]. Taken together, it is clear that efficient and correct cleavage depends on a



productive interaction between the T-/D-loop region and AtPRORP1, as has been shown for bacterial RPR [7, 21, 22; see also 51, 63–65].

Last, we find that the absence or presence of 3'-CCA in either pSu1 or pATSer does not affect cleavage-site selection by AtPRORP1 (Fig 3). The rate of cleavage, however, does change by two- to three-fold but not in any predictable fashion with the various substrates that we studied (Table 1). AtPRORP1-mediated cleavage of a plant mitochondrial pre-tRNA<sup>Cys</sup> was shown to be inhibited by the presence of a 3'-RCCA motif [11]. Together, these results with AtPRORP1 emphasize an important difference compared to bacterial RNase P, where the rate and fidelity of cleavage are dramatically affected when the 3'-CCA is deleted from either a pre-tRNA or "pAT-type" substrate; these results are expected due to the base pairing between the 3'-RCC of the pre-tRNA and a conserved GGU-motif in the RPR [13, 66]. Unlike bacterial pre-tRNAs, a 3'-CCA was predicted to be present in the initial pre-tRNA transcript for only 0.5% of the total suite of 423 organellar genome-encoded pre-tRNAs in eight plant/algal species. Thus, the 3'-CCA is unlikely to be a major contributor to AtPRORP1 catalysis (see also [18]).

### Substrate recognition by the bacterial ribozyme variant and AtPRORP1

For bacterial RNase P, biochemical and genetic studies have provided insight into substrate recognition features, and these were confirmed and extended by the crystal structure of the bacterial RNase P-tRNA complex [51]: (i) N<sub>-1</sub> in the pre-tRNA has a key role and might interact with a specific base in the RPR; (ii) the 2'-hydroxyl N<sub>-1</sub> is used to coordinate metal ions essential for catalysis; (iii) G<sub>+1</sub> in the pre-tRNA acts as a guidepost in the RNase P-substrate complex; (iv) the T-loop in the pre-tRNA is specifically recognized by an architectural motif of two inter-digitated T-loops in the RPR; and (v) 3'-RCC sequence of the pre-tRNA pairs with a conserved GGU sequence in the RPR [51]; for reviews see e.g. [1, 11]. The anticodon stem-loop was shown to be dispensable, which is expected given that all tRNAs are processed by RNase P. Two previous models [11, 42] show how AtPRORP1 might use the "acceptor-T-stem" stack as the main recognition determinant, an idea that is supported by our finding here that the pAT-Ser-type variants, which possess only the acceptor-T-stem stack element, are cleaved by AtPRORP1 with the same fidelity as the parental tRNA counterparts (Fig 3 and Table 3).

With respect to pre-tRNAs, however, AtPRORP1 is likely to interact with the amino acceptor-stem and the T-/D-loop region (Table 3). It is possible that the distance between T-/D-loop region and cleavage site determines metal-ion binding and cleavage-site selection by

**Table 3. Comparison of substrate recognition attributes of bacterial RNase P (RNP) and PRORPs.**

| Pre-tRNA location                                                        | Role in catalysis                           | Bacterial RNase P                       | PRORP                                    | References                          |
|--------------------------------------------------------------------------|---------------------------------------------|-----------------------------------------|------------------------------------------|-------------------------------------|
| 5'-leader                                                                | Substrate recognition                       | From N <sub>-1</sub> to N <sub>-7</sub> | Only N <sub>-1</sub> and N <sub>-2</sub> | [17, 18, 51]                        |
| N <sub>-1</sub> identity                                                 | Cleavage fidelity and efficiency            | Yes                                     |                                          | This study and [7, 15, 17]          |
| 2'-OH in N <sub>-1</sub>                                                 | Cleavage efficiency                         | Yes                                     |                                          | This study and [31, 32]             |
| G <sub>+1</sub> as positive and G <sub>-1</sub> as negative determinants | Cleavage-site selection                     | Yes                                     | No                                       | This study and [14, 15, 29]         |
| N <sub>-1</sub> :N <sub>-73</sub> base pairing                           | Cleavage fidelity                           | Yes                                     |                                          | This study and [14, 15, 17, 18, 29] |
| D-stem/loop                                                              | Rate of cleavage                            | Moderate                                | Significant                              | This study and [4, 11, 17, 18, 21]  |
| T-stem/loop                                                              | Rate of cleavage                            | Significant                             |                                          | This study and [4, 11, 17, 21]      |
| 3'-CCA motif                                                             | Substrate recognition and cleavage fidelity | Yes                                     | No                                       | This study and [9, 13, 17, 37]      |

doi:10.1371/journal.pone.0160246.t003

*AtPRORP1* [11], but this notion might need refinement if *AtPRORP1* (like the bacterial RPR) accepts substrates with shorter acceptor-/T-stem stacks. Additional insights are needed to ascertain whether this amounts to a measuring mechanism that has been suggested for bacterial and eukaryotic RNase P [58, 63, 67, 68]. Since we observe binding of both pATSerUG and pATSerUG<sub>GAAA</sub> but cleavage of only the former (Table 2; Fig 5), an induced-fit mechanism based on T-loop recognition is likely with *AtPRORP1*, again mirroring a proposal for bacterial RNase P [7, 21, 22].

Bacterial RPR/RNase P uses multiple determinants to define its cleavage site whereas *AtPRORP1* appears to employ fewer elements and differs notably in not using either the 5'-leader or the 3'-trailer (Table 3) [17, 18]. While this difference might signify how binding energy and cleavage-site selection are accomplished by nucleic acid- versus protein-based RNase P, it likely reflects the culmination of a catalytic strategy based on the co-evolution of each catalyst with its entire suite of substrates not just pre-tRNAs. Both forms of RNase P have honed in on the common denominators in all pre-tRNAs: the acceptor-T-stem stack and the T-/D-loop interaction [69], which incidentally is used as a recognition determinant by other RNAs and proteins that act on tRNA [70].

## Supporting Information

**S1 File. Tables A and B, Figs A-C with figure legends.**  
(PDF)

## Acknowledgments

This work was funded by the Swedish Research Council (N/T), Uppsala RNA Research Center (Swedish Research Council Linneus support) and Carl Tryggers Foundation, while VG was supported by the National Science Foundation (MCB-0843543) and the Behrman Research Fund. We are grateful to Drs. Edward Behrman and Mark Foster (OSU) for kindly providing FTSC and TEV protease, respectively. We thank Drs. Dmitri Kudryashov and Jennifer Ottesen (OSU) for generous consent to use their TECAN plate reader and MALDI-TOF, respectively.

## Author Contributions

**Conceived and designed the experiments:** GM THC ASS VG LAK.

**Performed the experiments:** GM THC ASS DK PKB.

**Analyzed the data:** GM THC ASS VG LAK.

**Contributed reagents/materials/analysis tools:** GM THC ASS.

**Wrote the paper:** GM THC ASS VG LAK.

## References

1. Lai L.B., Vioque A., Kirsebom L.A. and Gopalan V. Unexpected diversity of RNase P, an ancient tRNA processing enzyme: challenges and prospects. *FEBS Lett.* 2010; 584, 287–296. doi: [10.1016/j.febslet.2009.11.048](https://doi.org/10.1016/j.febslet.2009.11.048) PMID: [19931535](https://pubmed.ncbi.nlm.nih.gov/19931535/)
2. Lai L.B., Chan P.P., Cozen A.E., Bernick D.L., Brown J.W., Lowe T.M., et al. Discovery of a minimal form of RNase P in *Pyrobaculum*. *Proc. Natl. Acad. Sci. USA.* 2010; 107, 22493–22498. doi: [10.1073/pnas.1013969107](https://doi.org/10.1073/pnas.1013969107) PMID: [21135215](https://pubmed.ncbi.nlm.nih.gov/21135215/)
3. Guerrier-Takada C., Gardiner K., Marsh T., Pace N. and Altman S. The RNA moiety of ribonuclease P is the catalytic subunit of the enzyme. *Cell.* 1983; 35, 849–857. PMID: [6197186](https://pubmed.ncbi.nlm.nih.gov/6197186/)

4. McClain W.H., Guerrier-Takada C. and Altman S. Model substrates for an RNA enzyme. *Science*. 1987; 238, 527–530. PMID: [2443980](#)
5. Forster A.C. and Altman S. External guide sequences for an RNA enzyme. *Science*. 1990; 249, 783–786. PMID: [1697102](#)
6. Kufel J. and Kirsebom L.A. The P15-loop of *Escherichia coli* RNase P RNA is an autonomous divalent metal ion binding domain. *RNA*. 1998; 4, 777–788. PMID: [9671051](#)
7. Wu S., Kikovska E., Lindell M. and Kirsebom L.A. Cleavage mediated by the catalytic domain of bacterial RNase P RNA. *J. Mol. Biol.* 2012; 422, 204–214. doi: [10.1016/j.jmb.2012.05.020](#) PMID: [22626870](#)
8. Holzmann J., Frank P., Löffler E., Bennett K.L., Gerner C. and Rossmann W. RNase P without RNA: identification and functional reconstitution of the human mitochondrial tRNA processing enzyme. *Cell*. 2008; 135, 452–474.
9. Gobert A., Gutmann B., Taschner A., Gössinger M., Holzmann J., Giegé P., et al. A single Arabidopsis organellar protein has RNase P activity. *Nat. Struct. Mol. Biol.* 2010; 17, 740–746.
10. Zhou W., Karcher D., Fischer A., Maximova E., Walther D. and Bock R. (2015) Multiple RNA processing defects and impaired chloroplast function in plants deficient in the organellar protein-only RNase P enzyme. *PLoS One*, 10, e0120533. doi: [10.1371/journal.pone.0120533](#) PMID: [25793367](#)
11. Gobert A., Pinker F., Fuchsbauer O., Gutmann B., Boutin R., Giegé P., et al. Structural insights into protein-only RNase P complexed with tRNA. *Nat. Commun.* 2013; 4, 1353. doi: [10.1038/ncomms2358](#) PMID: [23322041](#)
12. Kirsebom L.A. and Trobro S. RNase P RNA-mediated cleavage. *IUBMB Life*. 2009; 61, 189–200. doi: [10.1002/iub.160](#) PMID: [19243011](#)
13. Kirsebom L.A. and Svärd S.G. Base pairing between *Escherichia coli* RNase P RNA and its substrate. *EMBO J.* 1994; 13, 4870–4876. PMID: [7525271](#)
14. Brännvall M., Pettersson B.M.F. and Kirsebom L.A. Importance of the +73/294 interaction in *Escherichia coli* RNase P RNA substrate complexes for cleavage and metal ion coordination. *J. Mol. Biol.* 2003; 325, 697–709. PMID: [12507473](#)
15. Wu S., Chen Y., Mao G., Trobro S., Kwiatkowski M. and Kirsebom L.A. Transition-state stabilization in *Escherichia coli* ribonuclease P RNA-mediated cleavage of model substrates. *Nucleic Acids Res.* 2014; 42, 631–642. doi: [10.1093/nar/gkt853](#) PMID: [24097434](#)
16. Kirsebom L.A. Roles of metal ions in RNase P catalysis. In *Ribonuclease P*, eds Altman S. and Liu F., Springer Verlag. 2010; pp 113–134.
17. Brillante N., Göbringer M., Lindenhofer D., Toth U., Rossmann W. and Hartmann R.K. (2016) Substrate recognition and cleavage-site selection by a single-subunit protein-only RNase P. *Nucleic Acids Res.*, 44, 2323–2336. doi: [10.1093/nar/gkw080](#) PMID: [26896801](#)
18. Howard M.J., Karasik A., Klemm B.P., Mei C., Shanmuganathan A., Koutmos M., et al. (2016) Differential substrate recognition by isozymes of plant protein-only ribonuclease P. *RNA*, 22, 782–792. doi: [10.1261/ma.055541.115](#) PMID: [26966150](#)
19. Milligan J.F., Groebe D.R., Witherell G.W. and Uhlenbeck O.C. Oligoribonucleotide synthesis using T7 RNA polymerase and synthetic DNA templates. *Nucleic Acids Res.* 1987; 15, 8783–8796. PMID: [3684574](#)
20. Kirsebom L.A. and Svärd S.G. Identification of a region within M1 RNA of *Escherichia coli* RNase P important for the location of the cleavage site on a wild-type tRNA precursor. *J. Mol. Biol.* 1993; 231, 594–604. PMID: [7685824](#)
21. Brännvall M., Kikovska E., Wu S. and Kirsebom L.A. Evidence for induced fit in bacterial RNase P RNA-mediated cleavage. *J. Mol. Biol.* 2007; 372, 1149–1164. PMID: [17719605](#)
22. Wu S., Chen Y., Lindell M., Mao G. and Kirsebom L.A. Functional coupling between a distal interaction and the cleavage site in bacterial RNase P-RNA-mediated cleavage. *J. Mol. Biol.* 2011; 411, 384–396. doi: [10.1016/j.jmb.2011.05.049](#) PMID: [21689663](#)
23. Vioque A., Arnez J. and Altman S. Protein-RNA interactions in the RNase P holoenzyme from *Escherichia coli*. *J. Mol. Biol.* 1988; 202, 835–848. PMID: [2459398](#)
24. Kikovska E., Wu S., Mao G. and Kirsebom L.A. Cleavage mediated by the P15 domain of bacterial RNase P RNA. *Nucleic Acids Res.* 2012; 40, 2224–2233. doi: [10.1093/nar/gkr1001](#) PMID: [22102593](#)
25. Chen W.Y., Singh D., Lai L.B., Stiffler M.A., Lai H.D., Gopalan V., et al. Fidelity of tRNA 5'-maturation: a possible basis for the functional dependence of archaeal and eukaryal RNase P on multiple protein cofactors. *Nucleic Acids Res.* 2012; 40, 4666–4680. doi: [10.1093/nar/gks013](#) PMID: [22298511](#)
26. Pagano J.M., Clingman C.C. and Ryder S.P. Quantitative approaches to monitor protein-nucleic acid interactions using fluorescent probes. *RNA* 2011; 17, 14–20. doi: [10.1261/ma.2428111](#) PMID: [21098142](#)

27. Qui C., Liu W-Y. and Xu Y-Z. Fluorescence labeling of short RNA by oxidation at the 3' end. *Meth. Mol. Biol.* 2015; 1297, 113–120.
28. Chen T-H., Tanimoto A., Shkriabai N., Kvaratskhelia M., Wysocki W.H. and Gopalan V. Use a chemical modification and mass spectrometry to identify substrate-contacting sites in proteinaceous RNase P, a tRNA processing enzyme. *Nucleic Acids Res.* 2016; 44,5344–5355. doi: [10.1093/nar/gkw391](https://doi.org/10.1093/nar/gkw391) PMID: [27166372](https://pubmed.ncbi.nlm.nih.gov/27166372/)
29. Brännvall M. and Kirsebom L.A. Manganese ions induce miscleavage in the Escherichia coli RNase P RNA-catalyzed reaction. *J. Mol. Biol.* 1999; 292, 53–63. PMID: [10493856](https://pubmed.ncbi.nlm.nih.gov/10493856/)
30. Brännvall M. and Kirsebom L.A. Metal ion cooperativity in ribozyme cleavage of RNA. *Proc. Natl. Acad. Sci. USA* 2001; 98, 12943–12947. PMID: [11606743](https://pubmed.ncbi.nlm.nih.gov/11606743/)
31. Brännvall M. and Kirsebom L.A. Complexity in orchestration of chemical groups near different cleavage sites in RNase P RNA mediated cleavage. *J. Mol. Biol.* 2005; 351, 251–257. PMID: [16005891](https://pubmed.ncbi.nlm.nih.gov/16005891/)
32. Brännvall M., Kikovska E. and Kirsebom L.A. Cross talk between the +73/294 interaction and the cleavage site in RNase P RNA mediated cleavage. *Nucleic Acids Res.* 2004; 32, 5418–5429. PMID: [15477392](https://pubmed.ncbi.nlm.nih.gov/15477392/)
33. Kikovska E., Mikkelsen N.E. and Kirsebom L.A. The naturally trans-acting ribozyme RNase P RNA has leadzyme properties. *Nucleic Acids Res.* 2005; 33, 6920–6930. PMID: [16332695](https://pubmed.ncbi.nlm.nih.gov/16332695/)
34. Kikovska E., Brännvall M. and Kirsebom L.A. The exocyclic amine at the RNase P cleavage site contributes to substrate binding and catalysis. *J. Mol. Biol.* 2006; 359, 572–584. PMID: [16638615](https://pubmed.ncbi.nlm.nih.gov/16638615/)
35. Kikovska E., Svärd S.G. and Kirsebom L.A. Eukaryotic RNase P RNA mediates cleavage in the absence of protein. *Proc. Natl. Acad. Sci. USA* 2007; 104, 2062–2067. PMID: [17284611](https://pubmed.ncbi.nlm.nih.gov/17284611/)
36. Pavlova L.V., Gössringer M., Weber C., Buzet A., Rossmanith W. and Hartmann R.K. tRNA processing by protein-only versus RNA-based RNase P: kinetic analysis reveals mechanistic differences. *Chem-biochem* 2012; 13, 2270–2276. doi: [10.1002/cbic.201200434](https://doi.org/10.1002/cbic.201200434) PMID: [22976545](https://pubmed.ncbi.nlm.nih.gov/22976545/)
37. Howard M.J., Klemm B.P. and Fierke C.A. Mechanistic studies reveal similar catalytic strategies for phosphodiester bond hydrolysis by protein-only and RNA-dependent ribonuclease P. *J. Biol. Chem.* 2015; 290, 13454–13464. doi: [10.1074/jbc.M115.644831](https://doi.org/10.1074/jbc.M115.644831) PMID: [25817998](https://pubmed.ncbi.nlm.nih.gov/25817998/)
38. Howard M.J., Lim W.H., Fierke C.A. and Koutmos M. Mitochondrial ribonuclease P structure provides insight into the evolution of catalytic strategies for precursor-tRNA 5' processing. *Proc. Natl. Acad. Sci. USA* 2012; 109, 16149–16154. doi: [10.1073/pnas.1209062109](https://doi.org/10.1073/pnas.1209062109) PMID: [22991464](https://pubmed.ncbi.nlm.nih.gov/22991464/)
39. Yuan Y. and Altman S. Substrate recognition by human RNase P: identification of small, model substrates for the enzyme. *EMBO J.* 1995; 14, 159–168. PMID: [7828588](https://pubmed.ncbi.nlm.nih.gov/7828588/)
40. Wells J.A. Additivity of mutational effects in proteins. *Biochemistry* 1990; 29, 8509–8517. PMID: [2271534](https://pubmed.ncbi.nlm.nih.gov/2271534/)
41. Fujii S., Suzuki T., Giege P., Higashiyama T., Koizuka N. and Shikanai T. The Restorer-of-fertility-like 2 pentatricopeptide repeat protein and RNase P are required for the processing of mitochondrial orf291 RNA in Arabidopsis. (2016); *Plant J.* (in press)
42. Pinker F., Bonnard G., Gobert A., Gutmann B., Hammani K. Giegé P et al. PPR proteins shed a new light on RNase P biology. *RNA Biol.* 2013; 10, 1457–1468. doi: [10.4161/ma.25273](https://doi.org/10.4161/ma.25273) PMID: [23925311](https://pubmed.ncbi.nlm.nih.gov/23925311/)
43. Itoh Y., Sekine S., Suetsugu S., Yokoyama S. (2013) Tertiary structure of bacterial selenocysteine tRNA. *Nucleic Acids Res.*; 41(13):6729–38 doi: [10.1093/nar/gkt321](https://doi.org/10.1093/nar/gkt321) PMID: [23649835](https://pubmed.ncbi.nlm.nih.gov/23649835/)
44. Karasik A., Shanmuganathan A., Howard M.J., Fierke C.A., Koutmos M. (2016) Nuclear Protein-Only Ribonuclease P2 Structure and Biochemical Characterization Provide Insight into the Conserved Properties of tRNA 5' End Processing Enzymes. *J Mol Biol.*, 428, 26–40. doi: [10.1016/j.jmb.2015.11.025](https://doi.org/10.1016/j.jmb.2015.11.025) PMID: [26655022](https://pubmed.ncbi.nlm.nih.gov/26655022/)
45. Peck-Miller K.A. and Altman S. Kinetics of the processing of the precursor to 4.5 S RNA, a naturally occurring substrate for RNase P from Escherichia coli. *J. Mol. Biol.* 1991; 221, 1–5. PMID: [1717693](https://pubmed.ncbi.nlm.nih.gov/1717693/)
46. Bothwell A.L., Garber R.L. and Altman S. Nucleotide sequence and in vitro processing of a precursor molecule to Escherichia coli 4.5 S RNA. *J. Biol. Chem.* 1976; 251, 7709–7716. PMID: [794064](https://pubmed.ncbi.nlm.nih.gov/794064/)
47. Persson T., Cuzic S. and Hartmann R.K. Catalysis by RNase P RNA: unique features and unprecedented active site plasticity. *J. Biol. Chem.* 2003; 278, 43394–43401. PMID: [12904300](https://pubmed.ncbi.nlm.nih.gov/12904300/)
48. Zahler N.H., Sun L., Christian E.L. and Harris M.E. The pre-tRNA nucleotide base and 2'-hydroxyl at N (-1) contribute to fidelity in tRNA processing by RNase P. *J. Mol. Biol.* 2005; 345, 969–985. PMID: [15644198](https://pubmed.ncbi.nlm.nih.gov/15644198/)
49. Perrault J.P. and Altman S. Important 2'-hydroxyl groups in model substrates for M1 RNA, the catalytic RNA subunit of RNase P from Escherichia coli. *J. Mol. Biol.* 1992; 228, 399–409.
50. Perrault J.P. and Altman S. Pathway of activation by magnesium ions of substrates for the catalytic subunit of RNase P from Escherichia coli. *J. Mol. Biol.* 1993; 230, 750–756. PMID: [7683057](https://pubmed.ncbi.nlm.nih.gov/7683057/)

51. Reiter N.J., Osterman A., Torres-Larios A., Swinger K.K., Pan T. and Mondragón A. Structure of a bacterial ribonuclease P holoenzyme in complex with tRNA. *Nature* 2010; 468, 784–789. doi: [10.1038/nature09516](https://doi.org/10.1038/nature09516) PMID: [21076397](https://pubmed.ncbi.nlm.nih.gov/21076397/)
52. Beebe J.A., Kurz J.C. and Fierke C.A. Magnesium ions are required by *Bacillus subtilis* ribonuclease P RNA for both binding and cleaving precursor tRNA<sup>Asp</sup>. *Biochemistry* 1996; 35, 10493–10505. PMID: [8756706](https://pubmed.ncbi.nlm.nih.gov/8756706/)
53. Green C.J. and Vold B.S. Structural requirements for processing of synthetic tRNA<sup>His</sup> precursors by the catalytic RNA component of RNase P. *J. Biol. Chem.* 1988; 263:652–657. PMID: [2447080](https://pubmed.ncbi.nlm.nih.gov/2447080/)
54. Burkard U., Wills I. and Söll D. Processing of histidine transfer RNA precursors. Abnormal cleavage site for RNase P. *J. Biol. Chem.* 1988; 263, 2447–2451. PMID: [3276688](https://pubmed.ncbi.nlm.nih.gov/3276688/)
55. Holm P. and Krupp G. The acceptor stem in pre-tRNAs determines the cleavage specificity of RNase P. *Nucleic Acids Res.* 1992; 20, 421–423. PMID: [1371348](https://pubmed.ncbi.nlm.nih.gov/1371348/)
56. Kirsebom L.A. and Svärd S.G. The kinetics and specificity of cleavage by RNase P is mainly dependent on the structure of the amino acid acceptor stem. *Nucleic Acids Res.* 1992; 20, 425–432. PMID: [1371349](https://pubmed.ncbi.nlm.nih.gov/1371349/)
57. Brännvall M., Pettersson B.M.F. and Kirsebom L.A. The residue immediately upstream of the RNase P cleavage site is a positive determinant. *Biochimie* 2002; 84, 693–703. PMID: [12457557](https://pubmed.ncbi.nlm.nih.gov/12457557/)
58. Svärd S.G. and Kirsebom L.A. Several regions of a tRNA precursor determine the *Escherichia coli* RNase P cleavage site. *J. Mol. Biol.* 1992; 227, 1019–1031. PMID: [1279179](https://pubmed.ncbi.nlm.nih.gov/1279179/)
59. Burkard U. and Söll D. The 5'-terminal guanylate of chloroplast histidine tRNA is encoded in its gene. *J. Biol. Chem.* 1988; 263, 9578–9581. PMID: [2838471](https://pubmed.ncbi.nlm.nih.gov/2838471/)
60. Placido A., Sieber F., Gobert A., Gallerni R., Giegé P. and Maréchal-Drouard L. Plant mitochondria use two pathways for the biogenesis of tRNA<sup>His</sup>. *Nucleic Acids Res.* 2010; 38, 7711–7717. doi: [10.1093/nar/gkq646](https://doi.org/10.1093/nar/gkq646) PMID: [20660484](https://pubmed.ncbi.nlm.nih.gov/20660484/)
61. Cooley L., Appel B. and Söll D. Post-transcriptional nucleotide addition is responsible for the formation of the 5' terminus of histidine tRNA. *Proc. Natl. Acad. Sci. USA* 1982; 79, 6475–6479. PMID: [6292903](https://pubmed.ncbi.nlm.nih.gov/6292903/)
62. Imai T., Nakamura T., Maeda T., Nakayama K., Gao X. Kimura M et al. Pentatricopeptide repeat motifs in the processing enzyme PRORP1 in *Arabidopsis thaliana* play a crucial role in recognition of nucleotide bases at TΨC loop in precursor tRNAs. *Biochem. Biophys. Res. Commun.* 2014; 450, 1541–1546. doi: [10.1016/j.bbrc.2014.07.030](https://doi.org/10.1016/j.bbrc.2014.07.030) PMID: [25034328](https://pubmed.ncbi.nlm.nih.gov/25034328/)
63. Svärd S.G. and Kirsebom L.A. Determinants of *Escherichia coli* RNase P cleavage site selection: a detailed in vitro and in vivo analysis. *Nucleic Acids Res.* 1993; 21, 427–434. PMID: [7680119](https://pubmed.ncbi.nlm.nih.gov/7680119/)
64. Loria A. and Pan T. Recognition of the T stem-loop of a pre-tRNA substrate by the ribozyme from *Bacillus subtilis* ribonuclease P. *Biochemistry* 1997; 36, 6317–6325. PMID: [9174346](https://pubmed.ncbi.nlm.nih.gov/9174346/)
65. Loria A., Niranjanakumari S., Fierke C.A. and Pan T. Recognition of a pre-tRNA substrate by the *Bacillus subtilis* RNase P holoenzyme. *Biochemistry* 1998; 37, 15466–15473. PMID: [9799509](https://pubmed.ncbi.nlm.nih.gov/9799509/)
66. Svärd S.G., Kagardt U. and Kirsebom L.A. Phylogenetic comparative mutational analysis of the base-pairing between RNase P RNA and its substrate. *RNA* 1996; 2, 463–472. PMID: [8665413](https://pubmed.ncbi.nlm.nih.gov/8665413/)
67. Carrara G., Calandra P., Fruscoloni P., Doris M. and Tocchini-Valentini G.P. Site selection by *Xenopus laevis* RNase P. *Cell* 1989; 58, 37–45. PMID: [2752421](https://pubmed.ncbi.nlm.nih.gov/2752421/)
68. Paisley T.E. and Van Tuyle G.C. The processing of wild type and mutant forms of rat nuclear pre-tRNA<sup>Lys</sup> by the homologous RNase P. *Nucleic Acids Res.* 1994; 22, 3347–3353. PMID: [8078770](https://pubmed.ncbi.nlm.nih.gov/8078770/)
69. Sun F.-J. and Caetano-Anollés G. The origin and evolution of tRNA inferred from phylogenetic analysis of structure. *J. Mol. Evol.* 2009; 66, 21–35.
70. Zhang J. and Ferré-D'Amaré A.R. The tRNA elbow in structure, recognition and evolution. *Life* 2016; 6, E3 doi: [10.3390/life6010003](https://doi.org/10.3390/life6010003) PMID: [26771646](https://pubmed.ncbi.nlm.nih.gov/26771646/)
